# Supplementary material
Source: publisher site journal article supplement (https://www.spandidos-publications.com/7474/downloadSupplementary)
Supplement: Supplementary file 1 [file downloadSupplementary]

## Sheet: IC50_GDSC
Table SXV. The estimated IC50 value of the chemotherapy agents by analyzing data from the GDSC dataset.
	TCGA-VQ-A91X-01	TCGA-VQ-A8P2-01	TCGA-CG-4466-01	TCGA-CG-4436-01	TCGA-IN-A6RI-01	TCGA-HU-A4GD-01	TCGA-VQ-A91Z-01	TCGA-BR-8676-01	TCGA-HU-A4H0-01	TCGA-R5-A7ZR-01	TCGA-D7-8573-01	TCGA-VQ-AA69-01	TCGA-R5-A7ZI-01	TCGA-BR-8680-01	TCGA-CG-4443-01	TCGA-VQ-A91U-01	TCGA-HU-A4GH-01	TCGA-VQ-A8PO-01	TCGA-IN-A6RO-01	TCGA-CG-5726-01	TCGA-D7-6822-01	TCGA-VQ-A8PJ-01	TCGA-VQ-A8DT-01	TCGA-HU-A4GX-01	TCGA-D7-6528-01	TCGA-RD-A8N2-01	TCGA-BR-4280-01	TCGA-CD-8531-01	TCGA-HU-A4H8-01	TCGA-HU-A4G9-01	TCGA-BR-A4PF-01	TCGA-MX-A666-01	TCGA-CD-8535-01	TCGA-BR-A4QL-01	TCGA-VQ-A8PH-01	TCGA-KB-A93H-01	TCGA-HU-8249-01	TCGA-CD-A4MG-01	TCGA-VQ-A8PB-01	TCGA-IN-A6RJ-01	TCGA-CD-8528-01	TCGA-HU-A4H2-01	TCGA-R5-A7ZE-01	TCGA-HU-A4GT-01	TCGA-VQ-A91N-01	TCGA-BR-8486-01	TCGA-RD-A7C1-01	TCGA-HU-A4GP-01	TCGA-BR-8373-01
5-Fluorouracil	177.335	32.3949	164.177	110.065	55.0826	81.9031	132.595	28.869	34.3226	73.5604	88.0188	164.841	71.5995	70.0862	138.001	126.585	90.4018	15.3997	77.0116	41.1239	135.671	150.302	77.9202	51.8335	149.627	988.244	21.4228	15.5235	68.4081	39.7544	116.448	195.659	294.574	30.9752	125.626	79.3628	75.4571	69.1905	52.0325	312.795	31.6206	55.6753	154.845	14.0871	154.221	88.4894	92.2717	60.3641	388.368
Paclitaxel	0.0711865	0.0136191	0.0450356	0.0613569	0.0609733	0.0301548	0.038226	0.0161332	0.0264968	0.105541	0.052719	0.0458822	0.0826408	0.0287782	0.259959	0.0495983	0.108213	0.0120496	0.0547712	0.020422	0.135245	0.0781786	0.0558247	0.029184	0.0279969	0.265312	0.0163079	0.00798149	0.0379105	0.0310528	0.0271272	0.0494579	0.0972512	0.0136639	0.0479622	0.0441085	0.111829	0.0308897	0.0254532	0.140629	0.0146255	0.0464607	0.190321	0.0164255	0.113342	0.106039	0.0341926	0.0485438	0.078518
Epirubicin	0.845765	0.203953	0.35557	0.772638	0.55528	0.342101	0.374264	0.166902	0.145724	0.334643	0.255603	0.289053	0.27675	0.308474	0.603334	0.66418	0.517067	0.125666	0.503318	0.223292	0.384671	0.578869	0.439591	0.157467	0.635009	0.890005	0.181648	0.0224516	0.195325	0.278595	0.364885	0.295062	0.326248	0.195796	0.315704	0.511164	0.455217	0.248812	0.252156	0.485876	0.193426	0.31831	0.700947	0.140937	0.27991	0.359054	0.39388	0.339274	0.578184
Cisplatin	84.0839	22.8596	16.0953	9.5469	55.4267	10.9434	80.3612	7.31728	8.31588	12.3202	22.7978	30.8459	7.53109	20.4833	112.9	22.2854	26.806	6.93736	26.328	14.4801	28.7006	27.2413	23.046	12.009	51.8407	170.105	10.5339	1.82353	20.2913	21.3271	18.7203	22.9583	49.1517	9.59013	10.9311	19.2967	17.0756	14.4796	18.0937	37.1151	7.95387	16.8603	50.1355	8.75351	66.066	17.8871	15.0333	15.9882	130.748
Oxaliplatin	37.1729	18.3617	35.6297	25.2254	60.4551	20.87	45.372	13.4354	16.9016	20.904	28.4229	38.8843	21.2698	19.061	84.2413	36.7468	92.1194	8.32699	46.7159	17.8872	50.9298	74.9046	30.3333	17.8443	46.9835	243.112	6.49498	2.64489	23.0159	17.4192	21.0801	42.837	84.2175	10.8618	25.2906	32.0764	8.67042	24.0545	24.3435	74.7571	13.6022	30.7596	98.9645	7.39316	82.9364	29.8364	34.0921	40.2537	68.2122
Docetaxel	0.0198817	0.00314732	0.00840325	0.0160811	0.0102045	0.0108197	0.0145133	0.0032803	0.00731555	0.015159	0.0116568	0.00755853	0.0117643	0.00630333	0.028296	0.0144781	0.0123881	0.00300233	0.00962935	0.00385255	0.019057	0.0159186	0.0102151	0.00540063	0.00839108	0.0287466	0.00514339	0.00282164	0.00689682	0.00678697	0.0114598	0.0121776	0.0125537	0.00395073	0.00964482	0.00900016	0.0138532	0.00638579	0.00472274	0.0135047	0.00355219	0.00848133	0.0152996	0.00431795	0.0134888	0.017052	0.00846391	0.00944145	0.0240726
Irinotecan	31.3842	16.7506	13.9378	18.8395	24.6289	7.18991	35.3017	4.23641	3.98094	7.31651	14.9774	12.2727	6.02524	15.3524	69.0191	12.1077	19.9007	3.14256	17.8627	5.99317	18.4695	31.1895	12.1171	5.05083	18.6584	49.7267	4.99212	1.34272	6.63228	9.74957	12.059	14.5979	31.6565	4.60921	6.46173	8.25082	6.1959	8.16628	12.0741	13.9362	7.07122	11.7156	26.733	4.43953	21.101	13.7015	6.80193	8.1224	85.3675
[truncated: 326 more columns]
